# Supplementary material
Source: Elsevier journal article supplement (https://www.sciencedirect.com/science/article/pii/S0325754119300884)
Supplement: mmc2 [file S0325754119300884:mmc2.xlsx]

## Sheet: Hoja1
ID number	Fecha toma de muestra	Source	Mating type	Genotype URA 5	Gender	Age (years)	Region	Occupation	Underlying condition
001-001-01	2009-04-03	CSF	α	VN I	Male	37	Centre	Construction worker	HIV seropositive
001-002-01	2009-04-03	CSF	α	VN I	Male	35	Centre	Commerce employees	HIV seropositive
001-003-01	2009-04-14	CSF	α	VN I	Male	34	Centre	Commerce employees	HIV seropositive
001-004-01	2009-04-21	CSF	α	VN I	Male	55	Centre	Construction worker	No underlying disease
001-005-01	2009-05-04	CSF	α	VN I	Female	33	Centre	Commerce employees	Tuberculosis - Pregnancy
001-006-01	2009-05-26	CSF	α	VN I	Male	41	Centre	No data	HIV seropositive
001-007-01	2009-07-10	CSF	aAαD	VN II + VN IV	Female	29	Centre	Housewives	HIV seropositive
001-008-01	2009-08-24	CSF	α	VN I	Male	50	Centre	Commerce employees	HIV seropositive
001-009-01	2009-12-18	Blood	α	VN I	Male	36	Centre	Commerce employees	HIV seropositive
001-010-01	2009	Blood	α	VN I	Female	31	Centre	No data	HIV seropositive
001-011-01	2010-02-22	Ascitic fluid	α	VN I	Female	28	Centre	Housewives	HIV seropositive
001-012-01	2010-03-05	CSF	α	VN I	Male	31	Centre	No data	HIV seropositive
001-013-01	2010-05-03	CSF	α	VN I	Male	30	Centre	Construction worker	HIV seropositive
001-014-01	2010-05-30	CSF	α	VN I	Male	29	Centre	Sex worker	HIV seropositive
001-015-01	2010-08-10	CSF	α	VN I	Male	40	Centre	Construction worker	HIV seropositive
001-017-01	2010-09-23	CSF	α	VN I	Female	43	Centre	Health worker	HIV seropositive
001-018-01	2010-09-28	CSF	α	VN I	Male	51	Centre	Construction worker	HIV seropositive
001-019-01	2010-10-25	CSF	α	VN I	Male	36	Centre	Construction worker	HIV seropositive
002-001-01	2009-06-05	Blood	α	VN I	Female	81	Centre	Housewives	Non-hodgkin lymphoma
002-002-01	2010-01-27	CSF	α	VN I	Female	40	Centre	Housewives	Kidney transplant
005-001-01	2009-08-25	Blood	α	VN I	Female	43	Centre	Commerce employees	HIV seropositive
005-002-01	2009-12-29	Blood	α	VN I	Female	47	Centre	No data	HIV seropositive
005-003-01	24/04/2010	CSF	α	VN I	Male	no data	Centre	Domestic worker	HIV seropositive
005-004-01	2010-06-15	CSF	α	VN I	Male	no data	Centre	Motorists or related	HIV seropositive
005-005-01	2010-11-06	CSF	α	VN I	Female	no data	Centre	Housewives	HIV seropositive
005-006-01	2010-12-22	CSF	α	VN I	Male	no data	Centre	No data	No data
005-007-01	2009-07-02	Blood	α	VN I	Male	29	Centre	Rural employee	HIV seropositive
007-001-01	2009-09-07	CSF	α	VN I	Male	32	Northwest	Motorists or related	HIV seropositive
007-002-01	2009-04-06	CSF	α	VN II	Male	52	Northwest	Motorists or related	HIV seropositive
007-003-02	2009-04-15	Skin	α	VN I	Male	23	Northwest	Gastronomic	HIV seropositive
007-004-01	2009-04-23	CSF	α	VN I	Male	28	Northwest	Commerce employees	HIV seropositive
007-005-01	2009	CSF	α	VN I	Female	33	Northwest	Health worker	Leukemia
007-006-02	08/08/2009	Blood	α	VN I	Male	35	Northwest	Office worker	HIV seropositive
007-007-01	2009-09-29	CSF	α	VN II	Female	no data	Northwest	Housewives	Rheumatoid arthritis
007-008-01	2010-04-12	CSF	α	VN I	Female	27	Northwest	No data	Non-hodgkin lymphoma
007-009-01	2010-05-20	Blood	α	VN I	Male	35	Northwest	No data	HIV seropositive
007-010-01	2010-05-16	sin dato	α	VN I	Male	29	Northwest	No data	HIV seropositive
007-011-01	2010-05-20	CSF	α	VN I	Male	26	Northwest	No data	HIV seropositive
007-012-01	2010-07-22	CSF	aAαD	VN II + VN IV	Male	33	Northwest	No data	HIV seropositive
007-013-01	2010-06-11	BAL	α	VN I	Male	45	Northwest	No data	HIV seropositive
007-014-01	2010-08-02	CSF	α	VN I	Male	28	Northwest	No data	HIV seropositive
007-015-01	2010-12-23	CSF	α	VN I	Male	33	Northwest	No data	HIV seropositive
007-017-02	2010-12-28	CSF	α	VN I	Male	29	Northwest	No data	HIV seropositive
007-018-01	2010-12-28	CSF	α	VN I	Female	50	Northwest	No data	Kidney transplant
007-020-02	2011-01-12	CSF	α	VN I	Male	33	Northwest	Motorists or related	HIV seropositive
007-021-01	2011-03-09	CSF	α	VN I	Male	21	Northwest	No data	HIV seropositive
008-002-01	2011-03-09	CSF	α	VN I	no data	no data	Cuyo	No data	No data
010-004-01	2010-10-01	CSF	α	VN I	Male	no data	Centre	No data	HIV seropositive
010-005-01	2010-09-10	CSF	α	VN I	Male	no data	Centre	No data	HIV seropositive
010-006-01	2010	CSF	α	VN I	Female	41	Centre	No data	HIV seropositive
010-007-01	2010	CSF	α	VN I	Male	33	Centre	Commerce employees	Tricholeukemia
010-008-01	2010	CSF	α	VN I	Female	29	Centre	Housewives	No data
010-009-01	2010	CSF	α	VN I	Male	36	Centre	Sex worker	HIV seropositive
010-010-01	2010	CSF	α	VN I	Male	27	Centre	No data	HIV seropositive
013-001-01	2010-10-15	CSF	α	VN I	Male	68	Centre	Construction worker	Mellitus diabetes - Kidney transplant
016-001-01	2010	CSF	α	VN I	Male	43	Centre	No data	HIV seropositive
017-001-02	2009-10-28	Blood	α	VN I	Male	57	Centre	Construction worker	HIV seropositive
017-002-01	2010-01-05	CSF	α	VN I	Male	34	Centre	Construction worker	HIV seropositive
017-003-01	2010-01-29	Blood	α	VN I	Female	34	Centre	No data	HIV seropositive
017-004-01	2010-08-28	CSF	α	VN I	Male	45	Centre	Construction worker	HIV seropositive
017-005-01	19/01/2011	Blood	α	VN I	Male	58	Centre	No data	Mellitus diabetes
017-006-01	2011-01-16	CSF	α	VN I	Female	22	Centre	No data	HIV seropositive
017-007-01	2011-03-13	CSF	α	VN I	Female	48	Centre	Housewives	HIV seropositive
021-001-01	2010-12-06	CSF	α	VN II	Male	50	Centre	No data	HIV seropositive
023-001-01	2009-04-25	CSF	α	VN I	Male	42	Centre	Office worker	HIV seropositive
023-002-01	18/09/2009	Blood	α	VN I	Male	44	Centre	Construction worker	HIV seropositive
023-003-01	2009-10-30	Blood	α	VN I	Male	no data	Centre	No data	Rheumatoid arthritis
024-001-01	2009-05-28	CSF	aAαD	VN II + VN IV	Male	no data	Centre	Motorists or related	HIV seropositive
024-002-01	2009-02-23	CSF	α	VN I	Female	28	Centre	Student	HIV seropositive
024-003-01	2009-06-26	CSF	α	VN I	Male	37	Centre	Domestic worker	HIV seropositive
024-004-01	2009	CSF	α	VN I	Male	25	Centre	Rural employee	HIV seropositive
024-005-01	2009-11-17	no data	α	VN I	Male	37	Centre	No data	HIV seropositive
024-006-01	2009	no data	α	VN I	Male	no data	Centre	No data	HIV seropositive
024-007-01	2009-12-23	no data	α	VN I	Male	35	Centre	Construction worker	HIV seropositive
024-008-01	2010-09-21	CSF	α	VN I	Male	40	Centre	No data	HIV seropositive
024-009-01	2010-10-06	CSF	α	VN I	Male	51	Centre	Construction worker	HIV seropositive
025-001-02	2009	CSF	α	VN I	Male	28	Northwest	No data	No data
025-002-01	2009	CSF	aAαD	VN II + VN IV	Female	34	Northwest	No data	HIV seropositive
025-004-01	2010-01-13	CSF	α	VN I	Female	22	Northwest	No data	HIV seropositive
025-006-01	2010-02-02	CSF	α	VN I	Male	47	Northwest	No data	HIV seropositive
025-008-01	2010	CSF	α	VN I	Male	47	Northwest	No data	HIV seropositive
025-009-01	2010	CSF	α	VN I	Male	no data	Northwest	No data	HIV seropositive
025-010-01	2010	CSF	α	VN II	Female	37	Northwest	No data	HIV seropositive
025-012-01	2010-05-01	CSF	aAαD	VN II + VN IV	Male	27	Northwest	No data	HIV seropositive
025-013-01	2010-07-05	CSF	α	VN I	Male	22	Northwest	No data	HIV seropositive
025-014-01	2010-12-02	CSF	aAαD	VN II + VN IV	Male	29	Northwest	No data	HIV seropositive
025-015-01	2010-12-09	Sputum	α	VG I	Female	32	Northwest	Housewives	HIV seropositive
025-016-01	2010-12-15	CSF	α	VN I	Male	no data	Northwest	Construction worker	No underlying disease
025-017-02	2010-12-29	CSF	α	VN I	Male	30	Northwest	Office worker	HIV seropositive
025-019-01	2011-01-20	CSF	α	VN II	Male	36	Northwest	Office worker	HIV seropositive
025-022-01	2011-01-19	CSF	α	VG I	Male	56	Northwest	Office worker	No underlying disease
026-001-01	2009-06-15	CSF	α	VN I	Female	33	Northeast	Housewives	Hypogammaglobulinemia
026-002-01	2009-08-17	CSF	α	VN I	Female	30	Northeast	Housewives	Rheumatoid arthritis
026-003-01	2009-09-10	CSF	α	VN I	Male	34	Northeast	Construction worker	HIV seropositive
026-004-01	2009-09-18	CSF	α	VN I	Male	29	Northeast	Student	HIV seropositive
026-005-01	2009-11-05	BAL	α	VN I	Female	no data	Northeast	Housewives	Rheumatoid arthritis
026-006-01	2009-12-05	BAL	α	VN II	Male	42	Northeast	Rural employee	No underlying disease
026-007-01	2010-02-03	CSF	α	VN I	Male	34	Northeast	Teacher	HIV seropositive
026-008-01	2010-03-08	CSF	α	VN I	Male	40	Northeast	Gastronomic	HIV seropositive
026-009-01	27/05/2010	CSF	α	VN I	Male	22	Northeast	No data	HIV seropositive
026-010-01	27/05/10	CSF	α	VN I	Male	60	Northeast	No data	Chronic lymphocytic leukemia
026-011-01	2010	Blood	α	VN I	Female	32	Northeast	Housewives	Systemic lupus erythematosus
026-012-01	2010-07-28	CSF	α	VN I	Male	35	Northeast	No data	HIV seropositive
026-013-01	2010-10-31	CSF	α	VN I	Male	30	Northeast	No data	HIV seropositive
026-014-01	2010-09-27	Orotracheal Tube	α	VN I	Female	45	Northeast	No data	Cholangitis
026-015-01	2010-12-15	CSF	α	VN I	Male	no data	Northeast	Domestic worker	No data
026-016-01	2010-12-09	CSF	α	VN I	Female	no data	Northeast	No data	Systemic lupus erythematosus
027-001-01	29/09/2009	CSF	α	VN I	Male	50	Centre	No data	HIV seropositive
027-002-01	06/04/2009	CSF	α	VN I	Female	35	Centre	No data	HIV seropositive
027-004-01	19/06/2009	Blood	α	VN I	Male	35	Centre	No data	HIV seropositive
027-006-01	04/08/2009	CSF	α	VN I	no data	44	Centre	No data	HIV seropositive
027-007-01	2009-09-11	Blood	α	VN I	Male	no data	Centre	No data	HIV seropositive
027-008-01	2009-04-01	CSF	α	VN I	Male	40	Centre	No data	No data
027-009-01	2009-10-26	no data	α	VN I	Male	23	Centre	No data	HIV seropositive
027-010-01	2009-10-28	CSF	α	VN I	Female	32	Centre	No data	Preganancy and malnutrition
027-011-01	2009	CSF	α	VN I	Male	37	Centre	No data	HIV seropositive
027-012-03	08/11/2009	CSF	α	VN I	Male	no data	Centre	No data	HIV seropositive
027-013-02	2009	Blood	α	VN I	Male	25	Centre	No data	HIV seropositive
027-014-01	04/12/2009	CSF	α	VN I	Male	no data	Centre	No data	HIV seropositive
027-015-01	14/01/2010	CSF	α	VN I	Male	no data	Centre	No data	HIV seropositive
027-016-01	05/03/2010	CSF	α	VN I	Male	40	Centre	No data	HIV seropositive
027-017-02	17/03/2011	Blood	α	VN I	Female	no data	Centre	No data	HIV seropositive
027-018-01	30/03/2010	CSF	α	VN I	Male	no data	Centre	No data	HIV seropositive
027-019-01	19/02/2010	CSF	α	VN I	Male	no data	Centre	No data	HIV seropositive
027-020-01	2009	Blood	α	VN I	Male	42	Centre	No data	HIV seropositive
027-021-02	25/03/2010	CSF	α	VN I	Male	no data	Centre	No data	HIV seropositive
027-022-02	2010	Blood	α	VN I	Male	38	Centre	No data	HIV seropositive
027-023-01	2010-08-30	CSF	α	VN II	Male	38	Centre	Construction worker	HIV seropositive
027-026-01	2011-03-14	CSF	α	VN I	Male	46	Centre	No data	HIV seropositive
027-028-01	2011-02-03	CSF	α	VN I	Female	22	Centre	Office worker	HIV seropositive
027-030-01	2010-12-30	CSF	α	VN I	Female	51	Centre	No data	HIV seropositive
027-031-01	2010-12-27	CSF	α	VN I	Male	45	Centre	No data	HIV seropositive
027-032-01	2010-09-29	CSF	α	VN I	Female	37	Centre	No data	HIV seropositive
028-001-01	2010-01-12	CSF	α	VN I	Female	19	Centre	No data	Systemic lupus erythematosus
028-002-01	2010-02-19	CSF	α	VN I	Male	34	Centre	No data	HIV seropositive
028-003-01	2011-01-14	CSF	α	VN I	Male	56	Centre	No data	HIV seropositive
028-004-01	2011-03-29	Blood	α	VN I	Male	40	Centre	No data	HIV seropositive
028-005-01	2010-09-11	Blood	α	VN I	Male	69	Centre	No data	HIV seropositive
029-001-01	2009-12-01	BAL	α	VN I	Male	no data	Centre	No data	HIV seropositive
029-001-01	2009-04-01	Skin	α	VN I	Female	36	Centre	No data	Systemic lupus erythematosus
029-002-01	2009-11-27	Blood	αAaD	VN III (VN I + VN II + VN IV)	Female	16	Centre	No data	Systemic lupus erythematosus
029-003-01	2010-08-31	CSF	α	VN I	Male	36	Centre	No data	HIV seropositive
030-001-01	2009-04-05	CSF	α	VN I	Male	49	Centre	Construction worker	HIV seropositive
030-002-01	2009-07-09	CSF	α	VN I	Male	38	Centre	No data	HIV seropositive
030-003-01	2009	CSF	α	VN I	Male	38	Centre	Commerce employees	No underlying disease
030-004-01	2009-11-09	CSF	α	VN I	Male	44	Centre	No data	HIV seropositive
031-001-01	2009-04-03	CSF	α	VN I	Male	33	Centre	Commerce employees	HIV seropositive
031-002-01	2009-06-15	CSF	α	VN I	Male	32	Centre	No data	HIV seropositive
031-003-01	2009-06-14	CSF	aAαD	VN II + VN IV	Male	43	Centre	No data	HIV seropositive
031-004-01	2009-08-18	CSF	α	VN I	Male	34	Centre	Construction worker	HIV seropositive
031-005-01	2009-11-19	CSF	α	VN I	Male	17	Centre	No data	HIV seropositive
031-006-01	2009-11-19	CSF	α	VN I	Female	31	Centre	No data	Autoimmune hemolytic anemia
031-008-01	2010-12-20	CSF	α	VN I	Male	35	Centre	No data	Immunodepression - Pneumonia
033-002-01	2009-10-08	CSF	α	VN I	Female	34	Northeast	Sex worker	HIV seropositive
033-003-01	2010-02-04	CSF	α	VN I	Male	41	Northeast	Health worker	Liver failure
034-001-01	2009-11-29	CSF	aAαD	VN II + VN IV	Female	30	Centre	Housewives	HIV seropositive
034-002-01	2010-02-03	Blood	α	VN I	Male	50	Centre	Rural employee	HIV seropositive
034-003-01	2010-07-26	Pleural fluid	α	VN I	Male	40	Centre	Construction worker	HIV seropositive
034-004-01	2010-09-03	CSF	α	VN I	Male	53	Centre	Rural employee	Non-hodgkin lymphoma
035-001-01	2009-04-29	CSF	α	VN I	Female	32	Centre	Housewives	HIV seropositive
035-002-01	2009-04-07	CSF	α	VN I	Female	no data	Centre	Commerce employees	HIV seropositive
035-003-02	2010-01-18	no data	α	VN I	Male	51	Centre	No data	HIV seropositive
035-004-01	2009-08-26	no data	α	VN I	Male	57	Centre	Motorists or related	HIV seropositive
035-005-01	12/02/2010	Blood	α	VN I	Female	32	Centre	No data	HIV seropositive
035-006-04	2009-08-07	no data	α	VN I	Male	33	Centre	Commerce employees	HIV seropositive
035-007-01	04/03/2010	CSF	α	VN I	Male	42	Centre	Domestic worker	HIV seropositive
035-008-02	19/03/2010	Blood	α	VN I	Male	41	Centre	No data	HIV seropositive
035-009-02	2010-04-06	Blood	α	VN I	Male	37	Centre	No data	HIV seropositive
035-010-01	2010-04-21	CSF	α	VN I	Male	20	Centre	No data	Systemic lupus erythematosus
035-011-02	2010-04-26	Blood	α	VN IV	Female	33	Centre	No data	HIV seropositive
035-012-01	2010-03-06	Blood	α	VN I	Male	34	Centre	No data	HIV seropositive
035-013-01	2010-07-12	Blood	α	VN I	Male	32	Centre	No data	HIV seropositive
035-014-01	2010-06-20	CSF	α	VN I	Male	no data	Centre	No data	HIV seropositive
035-015-02	2010-11-30	CSF	α	VN I	Male	48	Centre	No data	HIV seropositive
035-016-01	2010-11-20	CSF	α	VN I	Male	57	Centre	No data	HIV seropositive
035-017-01	2010-11-18	CSF	α	VN I	Male	33	Centre	No data	HIV seropositive
035-018-01	2010-11-30	Blood	α	VN I	Female	35	Centre	No data	HIV seropositive
035-019-04	2010-09-01	CSF	α	VN I	Male	23	Centre	Student	HIV seropositive
035-020-01	2010-09-20	CSF	α	VN I	Male	34	Centre	Construction worker	HIV seropositive
035-021-01	2010-11-21	CSF	α	VN I	Male	34	Centre	Commerce employees	HIV seropositive
035-022-01	2010-12-19	CSF	α	VN I	Male	55	Centre	Construction worker	HIV seropositive
035-023-02	2010-08-26	CSF	α	VN I	Male	43	Centre	No data	HIV seropositive
035-024-01	2010-10-01	CSF	α	VN II	Female	36	Centre	No data	Systemic lupus erythematosus
035-025-01	2010-12-31	CSF	α	VN I	Female	37	Centre	Office worker	HIV seropositive
037-001-01	2009-06-17	CSF	α	VN I	Female	49	Northwest	Office worker	HIV seropositive
037-002-01	2009-04-02	CSF	α	VN I	Female	38	Northwest	Commerce employees	HIV seropositive
037-003-01	2009-05-22	CSF	aAαD	VN II + VN IV	Male	22	Northwest	No data	HIV seropositive
037-004-01	11/08/2009	CSF	α	VN I	Female	20	Northwest	No data	HIV seropositive
037-005-01	2009-08-19	CSF	α	VN I	Male	26	Northwest	Construction worker	HIV seropositive
038-001-01	2009-04-15	CSF	α	VN I	Male	45	Centre	Office worker	HIV seropositive
038-002-01	2010-04-30	CSF	α	VN I	Female	33	Centre	No data	HIV seropositive
038-003-01	2011-02-21	CSF	α	VN I	Female	36	Centre	Housewives	No underlying disease
039-001-02	2010-02-11	Periarticular abscess fluid	α	VN I	Male	39	Patagonia	Sex worker	HIV seropositive
041-001-01	2009-06-19	Transbronchial biopsy	α	VN I	Male	80	Centre	Construction worker and pigeon breeder	No underlying disease
041-002-01	2010-11-28	CSF	α	VN I	Male	30	Centre	Office worker	Cellular immunosuppression
043-001-01	2009-09-08	CSF	α	VN I	Female	24	Centre	No data	HIV seropositive
044-001-01	2010-06-18	CSF	α	VN I	Male	37	Patagonia	Construction worker	HIV seropositive
045-001-01	2009	no data	α	VN I	no data	no data	Northwest	No data	No data
045-002-01	2009	no data	aAαD	VN II + VN IV	no data	no data	Northwest	No data	No data
045-003-01	2009	no data	α	VN II	no data	no data	Northwest	No data	No data
046-001-01	2009-05-12	CSF	α	VN I	Female	60	Centre	Housewives	HIV seropositive
046-002-01	2009-04-02	CSF	α	VN I	Female	37	Centre	No data	HIV seropositive
046-003-01	2009-04-17	CSF	α	VN I	Male	16	Centre	Rural employee	Hypogonadism - Hydrocephalus
047-001-01	2009-03-16	CSF	α	VN II	Male	37	Cuyo	No data	No data
047-002-01	2009-06-04	CSF	α	VN I	Male	no data	Cuyo	No data	HIV seropositive
047-003-01	2011-01-20	CSF	α	VN II	Male	30	Cuyo	Commerce employees	HIV seropositive
049-001-01	2009-12-05	Blood	α	VN I	Female	no data	Centre	No data	No data
049-002-02	2009-12-28	CSF	α	VN I	Male	no data	Centre	No data	HIV seropositive
049-003-02	2010-09-18	CSF	α	VN I	Male	54	Centre	Commerce employees	Mellitus diabetes
050-001-05	2010-03-15	CSF	α	VN I	Male	37	Centre	No data	HIV seropositive
050-002-01	2010-03-15	Blood	α	VN I	Female	36	Centre	No data	HIV seropositive
050-003-05	2010-01-25	CSF	α	VN I	Female	55	Centre	No data	HIV seropositive
050-004-01	2009-08-11	CSF	α	VN I	Male	43	Centre	Construction worker	HIV seropositive
050-005-01	2011-03-31	CSF	α	VN I	Male	49	Centre	Commerce employees	HIV seropositive
050-006-01	2011-03-01	Blood	α	VN I	Male	31	Centre	Domestic worker	HIV seropositive
050-007-01	2011-02-22	CSF	α	VN I	Male	41	Centre	Commerce employees	HIV seropositive
050-008-01	2010-08-13	Blood	α	VN I	Male	35	Centre	Construction worker	HIV seropositive
050-009-01	2011-01-23	CSF	α	VN I	Male	24	Centre	Office worker	HIV seropositive
050-010-01	2011-01-20	CSF	α	VN I	Male	41	Centre	Commerce employees	HIV seropositive
051-001-01	24/10/2009	CSF	α	VN I	Male	32	Northwest	Construction worker	HIV seropositive
051-002-01	08/06/2009	CSF	α	VN I	Male	24	Northwest	Rural employee	Chronic renal insufficiency, nephrotic syndrome. Stroke attack
051-003-01	28/07/2009	CSF	α	VN I	Male	29	Northwest	No data	No data
051-004-01	10/09/2009	CSF	α	VN I	Male	29	Northwest	Student	No data
051-008-01	25/10/2009	CSF	α	VN I	Male	55	Northwest	No data	HIV seropositive
051-009-01	09/09/2010	CSF	α	VN I	Female	73	Northwest	Housewives	Rheumatoid arthritis
051-010-01	06/10/2010	CSF	α	VN I	Male	67	Northwest	No data	HIV seropositive
051-011-01	11/08/2010	CSF	α	VN I	Female	63	Northwest	No data	HIV seropositive
051-012-02	12/09/2010	CSF	α	VN I	Male	20	Northwest	Artist	HIV seropositive
052-002-01	2010-09-17	CSF	α	VN I	Female	39	Centre	Commerce employees	HIV seropositive
052-003-01	2010-10-29	CSF	α	VN I	Male	32	Centre	Construction worker	HIV seropositive
052-004-01	2010-11-25	CSF	α	VN I	Female	29	Centre	No data	HIV seropositive
054-002-01	2009-04-27	CSF	α	VN I	Female	59	Centre	No data	Breast cancer
054-003-01	2009-05-22	CSF	α	VN I	Male	51	Centre	No data	HIV seropositive
054-004-01	2009-06-16	CSF	α	VN I	Female	no data	Centre	No data	HIV seropositive
054-005-01	2009	CSF	α	VN I	Female	29	Centre	No data	HIV seropositive
054-006-01	2009-06-08	CSF	α	VN I	Male	43	Centre	No data	HIV seropositive
054-007-01	2009-05-27	CSF	α	VN I	Male	37	Centre	No data	HIV seropositive
057-001-01	2009-04-08	CSF	α	VN I	Male	51	Centre	No data	Kidney transplant
057-002-01	16/09/2009	Blood	α	VN II	Male	40	Centre	No data	HIV seropositive
058-001-01	2009-04-10	Blood	α	VN I	Female	86	Centre	No data	Leukemia
058-002-01	2009-08-13	CSF	α	VN I	Male	32	Centre	Commerce employees	HIV seropositive
058-003-02	2010-09-13	CSF	α	VN I	Male	34	Centre	Operator	HIV seropositive
058-004-02	2010-09-16	CSF	α	VN I	Male	27	Centre	Commerce employees	HIV seropositive
058-005-01	2010-09-22	Blood	α	VN I	Female	36	Centre	Housewives	HIV seropositive
058-006-01	2010-12-22	CSF	α	VN I	Male	48	Centre	Construction worker	HIV seropositive
058-007-01	2011-01-17	BAL	α	VN I	Male	77	Centre	Construction worker	No underlying disease
058-008-01	2011-03-16	CSF	α	VN I	Male	29	Centre	Construction worker	HIV seropositive
060-002-01	2009-04-03	CSF	α	VN I	Female	25	Centre	No data	HIV seropositive
060-003-01	2009-06-22	CSF	aAαD	VN II + VN IV	Male	31	Centre	No data	HIV seropositive
060-005-01	2010-06-03	CSF	α	VN I	Male	28	Centre	No data	HIV seropositive
060-006-01	2010-11-07	CSF	α	VN I	Male	34	Centre	No data	HIV seropositive
060-007-01	2011-02-04	CSF	α	VN I	Male	52	Centre	Health worker	HIV seropositive
062-001-02	2010-03-15	Blood	α	VN I	Male	55	Centre	No data	HIV seropositive
062-002-01	2010-03-29	Blood	α	VN I	Female	62	Centre	No data	Hashimoto's thyroiditis
063-001-01	2009-04-08	CSF	α	VN I	Male	40	Centre	No data	HIV seropositive
063-002-01	2009-04-28	CSF	α	VN I	Male	30	Centre	Commerce employees	HIV seropositive
063-003-01	2009-06-26	CSF	aAαD	VN II + VN IV	Male	27	Centre	Rural employee	HIV seropositive
063-004-01	2009-07-01	Blood	α	VN IV	Male	40	Centre	Construction worker	HIV seropositive
063-006-01	17/07/2009	CSF	α	VN I	Female	35	Centre	Housewives	HIV seropositive
063-007-03	18/08/09	Blood	α	VN I	Male	38	Centre	No data	HIV seropositive
063-008-01	2009-08-14	BAL	α	VN I	Female	41	Centre	No data	HIV seropositive
063-009-01	2009-09-18	CSF	α	VN I	Male	34	Centre	No data	HIV seropositive
063-010-01	2009-11-03	CSF	α	VN I	Male	38	Centre	No data	HIV seropositive
063-011-01	2009-10-31	CSF	α	VN I	Male	30	Centre	Commerce employees	HIV seropositive
063-012-01	2009-10-26	Blood	α	VN I	Male	43	Centre	No data	HIV seropositive
063-013-01	2009-10-19	CSF	α	VN I	Male	39	Centre	Office worker	HIV seropositive
063-014-01	2009-11-23	CSF	α	VG I	Female	41	Centre	No data	HIV seropositive
063-015-01	2009-01-04	Blood	α	VN I	Female	41	Centre	No data	HIV seropositive
063-016-01	2009-01-15	CSF	α	VN I	Male	41	Centre	No data	HIV seropositive
063-017-01	2009-12-16	CSF	α	VN II	Male	30	Centre	No data	HIV seropositive
063-018-02	2010-02-19	Blood	α	VN II	Male	34	Centre	Construction worker	HIV seropositive
063-019-01	2010-03-19	CSF	α	VN I	Female	42	Centre	No data	HIV seropositive
063-020-01	2010-03-20	CSF	α	VN I	Female	35	Centre	Housewives	HIV seropositive
063-021-01	2010-03-29	CSF	α	VN IV	Female	37	Centre	No data	HIV seropositive
063-023-01	06/05/2010	CSF	α	VN I	Male	41	Centre	No data	HIV seropositive
063-024-01	14/04/2010	CSF	α	VN I	Male	38	Centre	No data	HIV seropositive
063-025-01	21/04/2010	CSF	α	VN I	Male	51	Centre	Commerce employees	HIV seropositive
063-026-02	2010-07-13	CSF	α	VN I	Female	28	Centre	No data	HIV seropositive
063-027-01	2010-08-09	CSF	α	VN I	Female	46	Centre	No data	No data
063-028-01	2010-06-21	Pleural fluid	α	VN I	Male	51	Centre	No data	HIV seropositive
063-029-01	2010-06-21	Blood	α	VN I	Male	27	Centre	No data	HIV seropositive
063-030-01	2010-08-31	CSF	α	VN I	Female	no data	Centre	No data	HIV seropositive
063-031-01	2010-09-18	CSF	α	VN I	Male	40	Centre	No data	HIV seropositive
063-032-02	2010-09-27	CSF	α	VN I	Male	38	Centre	Construction worker	HIV seropositive
063-033-01	2010-10-01	CSF	α	VN I	Female	40	Centre	No data	HIV seropositive
063-035-02	2010-10-10	CSF	α	VN I	Female	31	Centre	Housewives	HIV seropositive
063-036-01	2010-11-02	CSF	α	VN I	Male	no data	Centre	No data	HIV seropositive
063-037-02	2010-11-09	CSF	α	VN I	Male	42	Centre	No data	No data
063-038-01	2011-02-01	CSF	α	VN I	Female	42	Centre	Commerce employees	HIV seropositive
063-039-01	2010-12-07	Blood	α	VN I	Female	no data	Centre	No data	Kidney transplant
063-040-01	2011-01-10	CSF	αAαD	VN III (VN I + VN II + VN IV)	Male	no data	Centre	No data	No data
063-041-01	2011-01-21	CSF	α	VN I	Female	51	Centre	Housewives	HIV seropositive
063-042-01	2011-02-19	CSF	α	VN I	Male	56	Centre	Artist	HIV seropositive
064-001-01	2009-11-27	CSF	α	VG II	Male	42	Centre	Commerce employees	No underlying disease
064-002-01	2009	no data	α	VN I	no data	no data	Centre	No data	No data
064-003-01	2010-10-05	CSF	α	VN I	Male	36	Centre	No data	No data
064-004-01	2010-12-10	CSF	α	VN I	Male	51	Centre	No data	HIV seropositive
066-001-01	2009-03-28	CSF	α	VN II	Male	35	Centre	Student	HIV seropositive
066-002-01	2009-11-01	CSF	α	VN I	Male	35	Centre	Motorists or related	HIV seropositive
066-003-01	2009-10-10	CSF	α	VN I	Male	40	Centre	Office worker	Systemic lupus erythematosus
066-004-01	2009-04-22	CSF	α	VN I	Female	34	Centre	Student	HIV seropositive
066-005-01	2009-07-15	CSF	α	VN I	Male	37	Centre	Commerce employees	HIV seropositive
067-001-01	2010-07-19	CSF	α	VN I	Male	28	Cuyo	Office worker and Student	HIV seropositive
068-001-01	26/03/2010	Blood	α	VN I	Female	79	Centre	Housewives	Renal failure - Hypothyroidism
068-002-01	04/01/2010	CSF	α	VN I	Female	11	Centre	Student	Organ transplant
068-003-02	2010	Cellulitis	α	VN I	Female	62	Centre	No data	No data
068-004-02	2010	CSF	α	VN I	no data	no data	Centre	No data	No data
068-005-01	2010	BAL	α	VN I	Male	42	Centre	No data	No data
071-001-01	15/03/2011	CSF	α	VN I	Female	35	Patagonia	Housewives	No data
072-001-01	08/2009	CSF	α	VN I	Female	37	Northwest	Housewives	HIV seropositive
072-002-01	2010	CSF	α	VN I	Male	41	Northwest	Office worker	Mellitus diabetes
072-003-01	2010-10-27	CSF	α	VN I	Male	24	Northwest	No data	HIV seropositive
074-001-01	2009-05-26	CSF	α	VN II	Male	48	Cuyo	No data	HIV seropositive
078-001-02	2009-12-07	CSF	α	VN I	Male	24	Centre	No data	HIV seropositive
078-002-01	2011-02-03	Blood	α	VN I	Male	no data	Centre	No data	HIV seropositive
083-001-01	2009-04-16	CSF	α	VN I	Female	33	Northwest	Housewives	HIV seropositive
083-002-01	13/04/2010	CSF	α	VN I	Male	35	Northwest	No data	HIV seropositive
084-001-01	2009-12-30	no data	α	VN I	Male	28	Centre	No data	HIV seropositive
084-002-01	2010-03-30	no data	α	VN IV	Female	35	Centre	No data	HIV seropositive
084-003-01	2009-04-15	BAL	α	VN I	Male	37	Centre	No data	No data
084-004-01	2010-08-01	CSF	aAαD	VN II + VN IV	Male	40	Centre	No data	HIV seropositive
085-001-01	2010-01-15	CSF	α	VN II	Male	29	Northeast	No data	HIV seropositive
085-002-01	2009-10-31	CSF	α	VN I	Male	36	Northeast	No data	HIV seropositive
085-003-01	2010-09-15	Blood	α	VN I	Male	35	Northeast	No data	HIV seropositive
085-004-01	2010-09-25	Pericardial puncture	α	VN I	Male	29	Northeast	No data	No underlying disease
085-005-01	2010-09-23	BAL	α	VN I	Male	60	Northeast	No data	Chronic lung disease
090-001-01	2010-01-02	CSF	α	VN I	Male	no data	Centre	No data	HIV seropositive
090-002-01	2009-12-17	CSF	α	VN I	Male	63	Centre	No data	Kidney transplant
093-001-01	2009-07-16	Ascitic fluid	aAαD	VN II + VN IV	Male	39	Centre	Commerce employees	HIV seropositive
093-002-01	2009-08-04	Blood	α	VN I	Female	no data	Centre	Housewives	HIV seropositive
093-003-02	2009-08-12	CSF	α	VN I	Male	37	Centre	Sex worker	HIV seropositive
093-004-01	2009-11-12	Blood	α	VN I	Male	39	Centre	Commerce employees	HIV seropositive
093-005-01	2010-04-05	CSF	α	VN I	Male	52	Centre	Construction worker	HIV seropositive
093-006-01	2010-03-30	Blood	α	VN I	Male	no data	Centre	Construction worker	HIV seropositive
093-007-01	2010-04-15	CSF	α	VN I	Female	60	Centre	Housewives	Addison's disease, Hypothyroidism, Idiopathic thrombocytopenic purpura
093-008-01	2010	CSF	α	VN I	Female	30	Centre	Sex worker	No data
093-009-01	17/05/10	Blood	α	VN I	Male	42	Centre	Commerce employees	HIV seropositive
093-010-01	2010-08-20	CSF	α	VN I	Male	44	Centre	Commerce employees	HIV seropositive
093-011-01	2010-09-24	CSF	α	VN I	Male	no data	Centre	No data	HIV seropositive
093-013-01	2010-11-05	CSF	α	VN I	Male	no data	Centre	Commerce employees	HIV seropositive
093-014-01	2011-02-07	Blood	α	VN I	Female	no data	Centre	Housewives	HIV seropositive
093-015-01	2011-01-31	Blood	α	VN II	Female	30	Centre	Construction worker	HIV seropositive
093-016-01	2011-02-01	Blood	α	VN I	Male	34	Centre	Motorists or related	HIV seropositive
093-018-02	2011-03-30	CSF	α	VN I	Female	40	Centre	No data	HIV seropositive
093-019-01	2011-03-10	CSF	α	VN I	Male	27	Centre	Artist	HIV seropositive
096-001-01	2009-07-31	CSF	α	VN I	Male	48	Northeast	Motorists or related	HIV seropositive
096-002-01	2009-05-04	CSF	α	VN I	Male	57	Northeast	No data	Mellitus diabetes
096-003-01	2009-11-03	CSF	α	VN I	Male	36	Northeast	Office worker	HIV seropositive
096-004-01	2009-10-17	CSF	α	VN I	Male	35	Northeast	No data	HIV seropositive
096-005-01	2010	CSF	α	VN I	Male	31	Northeast	Commerce employees	HIV seropositive
096-006-01	2010-05-04	CSF	α	VN I	Male	26	Northeast	No data	HIV seropositive
096-007-01	2010-08-12	CSF	α	VN II	Female	64	Northeast	No data	HIV seropositive
096-008-01	2010-10-20	CSF	α	VN I	Female	47	Northeast	Housewives	HIV seropositive
096-009-01	2010-07-24	CSF	α	VN I	Male	55	Northeast	Office worker	HIV seropositive
096-010-01	2011-03-11	CSF	α	VN I	Female	60	Northeast	Housewives	HIV seropositive
096-011-01	2011-03-11	CSF	α	VN I	Male	35	Northeast	Commerce employees	HIV seropositive
097-001-01	2009-09-10	CSF	α	VN I	Male	26	Northeast	Office worker	HIV seropositive
097-002-01	2009-06-16	CSF	α	VN II	Male	29	Northeast	Commerce employees	HIV seropositive
097-003-01	2009-04-14	CSF	α	VN II	Female	62	Northeast	Housewives	HIV seropositive
097-004-01	2010-06-16	CSF	α	VN I	Male	29	Northeast	Office worker	Neutropenia
097-005-01	2010-05-13	CSF	α	VN I	Male	35	Northeast	Motorists or related	HIV seropositive
097-007-01	2011-02-27	CSF	α	VN I	Female	39	Northeast	Housewives	HIV seropositive
097-008-01	2011-04-18	CSF	α	VN I	Male	no data	Northeast	Commerce employees	HIV seropositive
097-009-01	2011-03-21	CSF	α	VN II	Male	34	Northeast	Motorists or related	HIV seropositive
097-010-01	2011-04-29	Skin	α	VN I	Male	44	Northeast	Office worker	HIV seropositive
098-001-01	2009-08-24	CSF	α	VN I	Female	50	Centre	Housewives	HIV seropositive
099-001-01	2009	Pleural biopsy	α	VN I	Male	no data	Centre	Student	No underlying disease
101-001-01	2009-12-17	CSF	α	VN I	Female	31	Centre	Housewives	HIV seropositive
101-003-02	2009-12-11	Blood	α	VN I	Male	43	Centre	No data	HIV seropositive
102-001-01	2009-08-01	CSF	α	VN I	Male	45	Centre	No data	HIV seropositive
103-001-01	2009	CSF	α	VN I	Male	43	Centre	No data	HIV seropositive
103-002-01	2009	CSF	α	VN I	Male	no data	Centre	No data	HIV seropositive
